# Supplementary material for: Risk of Mortality Prediction Involving Time-Varying Covariates for Patients with Heart Failure Using Deep Learning
Source: MDPI journal article supplement (doi:10.3390/diagnostics12122947), 2022-11-25
Supplement: s1 [file s1]

## Supplementary Material

**Supplementary Table S1. Characteristics of Patients with Heart Failure for Model Development**

| Covariates                                                           | Total<br>(n=562) | All-cause mortality<br>(n = 81) | Survive<br>(n = 481) | P value |
|----------------------------------------------------------------------|------------------|---------------------------------|----------------------|---------|
| Follow Up (month)                                                    | 30.9±13.7        | 9.9±10.3                        | 34.4±10.8            | <0.001  |
| Cardiovascular mortality                                             | 39 (6.9)         | 39 (48.1)                       | 0 (0)                | NA      |
| Age (years)                                                          | 77.8±13.3        | 82.8±9.0                        | 77.0±13.7            | <0.001  |
| Female                                                               | 257 (45.7)       | 33 (40.7)                       | 224 (46.6)           | 0.393   |
| Length of stay (day)                                                 | 19.3±15.7        | 19.3±13.2                       | 19.3±16.1            | 0.467   |
| Prior admission times                                                | 2.4±2.1          | 2.9±2.3                         | 2.3±2.1              | 0.002   |
| Weight (kg)                                                          | 54.4±14.8        | 51.7±12.3                       | 54.9±15.2            | 0.041   |
| Body mass index (kg/m <sup>2</sup> )                                 | 21.7±4.4         | 21.0±4.0                        | 21.8±4.4             | 0.190   |
| Hypertension                                                         | 363 (64.6)       | 56 (69.1)                       | 307 (63.8)           | 0.424   |
| Hyperlipemia                                                         | 252 (44.8)       | 42 (51.9)                       | 210 (43.7)           | 0.211   |
| Diabetes mellitus                                                    | 190 (33.8)       | 27 (33.3)                       | 163 (33.9)           | 0.977   |
| Chronotropic incompetence                                            | 88 (15.7)        | 14 (17.3)                       | 74 (15.4)            | 0.787   |
| Ischemic heart disease                                               | 179 (31.9)       | 34 (42.0)                       | 145 (30.2)           | 0.047   |
| Peripheral arterial disease                                          | 50 (8.9)         | 10 (12.4)                       | 40 (8.3)             | 0.333   |
| Atrial fibrillation                                                  | 303 (53.9)       | 43 (53.1)                       | 260 (54.1)           | 0.967   |
| Vascular disease                                                     | 194 (34.5)       | 34 (42.0)                       | 160 (33.3)           | 0.162   |
| New York Heart Association (NYHA) at admission                       |                  |                                 |                      | 0.469   |
| 1                                                                    | 24 (4.3)         | 4 (4.9)                         | 20 (4.2)             |         |
| 2                                                                    | 147 (26.2)       | 20 (24.7)                       | 127 (26.4)           |         |
| 3                                                                    | 281 (50.0)       | 37 (45.7)                       | 244 (50.7)           |         |
| 4                                                                    | 110 (19.6)       | 20 (24.7)                       | 90 (18.7)            |         |
| NYHA at discharge                                                    |                  |                                 |                      | <0.001  |
| 1                                                                    | 66 (11.7)        | 5 (6.2)                         | 61 (12.7)            |         |
| 2                                                                    | 426 (75.8)       | 48 (59.3)                       | 378 (78.6)           |         |
| 3                                                                    | 54 (9.6)         | 18 (22.2)                       | 36 (7.5)             |         |
| 4                                                                    | 16 (2.9)         | 10 (12.4)                       | 6 (1.3)              |         |
| Frail (frailty class≥3)                                              | 525 (93.4)       | 79 (97.5)                       | 446 (92.7)           | 0.170   |
| CHADS <sub>2</sub>                                                   | 3.0±1.2          | 3.2±1.2                         | 2.9±1.2              | 0.044   |
| CHA <sub>2</sub> DS <sub>2</sub> -VASc                               | 5.2±1.8          | 5.6±1.7                         | 5.1±1.8              | 0.034   |
| Independence in daily life for the elderly with cognitive impairment |                  |                                 |                      | <0.001  |
| 0                                                                    | 425 (75.6)       | 48 (59.3)                       | 377 (78.4)           |         |
| 1                                                                    | 99 (17.6)        | 23 (28.4)                       | 76 (15.8)            |         |
| 2                                                                    | 31 (5.5)         | 9 (11.1)                        | 22 (4.6)             |         |
| 3                                                                    | 3 (0.5)          | 0 (0)                           | 3 (0.6)              |         |
| 4                                                                    | 4 (0.7)          | 1 (1.2)                         | 3 (0.6)              |         |
| Low ADL at admission                                                 | 72 (12.8)        | 17 (21.0)                       | 55 (11.4)            | 0.028   |
| Low ADL at discharge                                                 | 31 (5.5)         | 14 (17.3)                       | 17 (3.5)             | <0.001  |

|                                                       |            |            |            |        |
|-------------------------------------------------------|------------|------------|------------|--------|
| Left ventricular (LV) ejection fraction (%)           | 47.2±18.8  | 46.5±19.0  | 47.4±18.8  | 0.700  |
| HFrEF                                                 | 197 (35.0) | 29 (35.8)  | 168 (34.9) |        |
| HFmrEF                                                | 114 (20.3) | 18 (22.2)  | 96 (20.0)  |        |
| HFpEF                                                 | 251 (44.7) | 34 (42.0)  | 217 (45.1) |        |
| LV end-diastolic volume (mL)                          | 124.8±58.7 | 131.4±73.7 | 123.7±55.9 | 0.845  |
| LV end-diastolic dimension (mm)                       | 49.7±10.2  | 50.5±12.2  | 49.6±9.8   | 0.506  |
| LV end-systolic diameter (mm)                         | 38.1±12.3  | 39.2±14.3  | 37.9±12.0  | 0.678  |
| Left atrial diameter (mm)                             | 45.0±8.4   | 46.0±8.8   | 44.9±8.3   | 0.303  |
| Mitral regurgitation                                  | 1.5±1.1    | 1.8±1.1    | 1.5±1.1    | 0.030  |
| Tricuspid regurgitation                               | 1.3±1.1    | 1.6±1.2    | 1.3±1.0    | 0.034  |
| RVSP (mmHg)                                           | 29.2±10.3  | 31.0±11.1  | 28.9±10.2  | 0.053  |
| Atrial septal defect after ablation                   | 30 (5.3)   | 4 (4.9)    | 26 (5.4)   | 0.925  |
| Aortic valve replacement                              | 27 (4.8)   | 5 (6.2)    | 22 (4.6)   | 0.733  |
| Hemodialysis                                          | 21 (3.7)   | 5 (6.2)    | 16 (3.3)   | 0.351  |
| ICD                                                   | 5 (0.9)    | 0 (0)      | 5 (1.0)    | 1      |
| CRT-D                                                 | 24 (4.3)   | 5 (6.2)    | 19 (4.0)   | 0.370  |
| CRT-P                                                 | 4 (0.7)    | 1 (1.2)    | 3 (0.6)    | 0.464  |
| Pacemaker                                             | 66 (11.7)  | 10 (12.3)  | 56 (11.6)  | 1      |
| ACEi/ARB                                              | 268 (47.7) | 51 (63.0)  | 217 (45.1) | 0.004  |
| Beta blockers                                         | 286 (50.9) | 48 (59.3)  | 238 (49.5) | 0.131  |
| Mineralocorticoid receptor antagonist                 | 149 (26.5) | 28 (34.6)  | 121 (25.2) | 0.101  |
| Diuretic                                              | 302 (53.7) | 49 (60.5)  | 253 (52.6) | 0.231  |
| DOACWFuse at admission                                | 208 (37.0) | 34 (42.0)  | 174 (36.2) | 0.381  |
| DOACWFuse at discharge                                | 272 (48.4) | 34 (42.0)  | 238 (49.5) | 0.919  |
| eGFR at admission (mL/min/1.73m <sup>2</sup> )        | 42.8±21.1  | 34.7±21.4  | 44.2±20.8  | <0.001 |
| < 60 mL/min/1.73m <sup>2</sup>                        | 460 (81.9) | 70 (86.4)  | 390 (81.1) |        |
| eGFR at discharge (mL/min/1.73m <sup>2</sup> )        | 40.8±21.2  | 29.2±18.9  | 42.7±21.0  | <0.001 |
| < 60 mL/min/1.73m <sup>2</sup>                        | 494 (87.9) | 77 (95.1)  | 417 (86.7) |        |
| Creatinine clearance rate (CrC) at admission (mL/min) | 40.3±26.9  | 28.0±17.6  | 42.4±27.6  | <0.001 |
| CrC at discharge (mL/min)                             | 37.9±24.8  | 24.6±16.4  | 40.1±25.3  | <0.001 |

|                                                    |            |            |            |        |
|----------------------------------------------------|------------|------------|------------|--------|
| Creatinine (Cr) at admission (mg/dL)               | 1.5±1.3    | 1.9±1.5    | 1.4±1.2    | <0.001 |
| Cr at discharge (mg/dL)                            | 1.6±1.5    | 2.5±2.5    | 1.4±1.2    | <0.001 |
| Log(NT-proB-type natriuretic peptide) (pg/mL)      | 3.6±0.5    | 3.9±0.5    | 3.6±0.5    | <0.001 |
| Albumin (g/dL)                                     | 3.4±0.5    | 3.3±0.5    | 3.4±0.5    | 0.007  |
| Total protein (g/dL)                               | 7.0±0.6    | 7.0±0.6    | 7.0±0.6    | 0.592  |
| C-reactive protein (mg/dL)                         | 2.3±4.1    | 2.6±3.6    | 2.3±4.2    | 0.041  |
| Hemoglobin (g/dL)                                  | 11.9±2.4   | 11.3±2.1   | 12.0±2.4   | 0.008  |
| Systolic blood pressure (SBP) at admission (mmHg)  | 132.1±25.9 | 128.2±31.9 | 132.7±24.7 | 0.224  |
| SBP at discharge (mmHg)                            | 112.2±18.1 | 104.9±24.7 | 113.4±16.4 | 0.003  |
| Diastolic blood pressure (DBP) at admission (mmHg) | 72.8±32.2  | 76.9±73.4  | 72.1±17.7  | 0.272  |
| DBP at discharge (mmHg)                            | 59.3±10.3  | 55.9±12.8  | 59.9±9.7   | 0.008  |
| Heart rate at admission (bpm)                      | 85.3±23.1  | 83.5±19.4  | 85.6±23.7  | 0.394  |
| Heart rate at discharge (bpm)                      | 70.2±13.9  | 73.2±18.6  | 69.7±12.9  | 0.104  |

ACEi (Angiotensin-converting enzyme inhibitor); ADL (activities of daily living); ARB (Angiotensin receptor blocker); CHADS<sub>2</sub> (congestive heart failure: 1 point; hypertension: 1 point; age ≥ 75 years: 1 point; diabetes mellitus: 1 point; prior stroke or TIA or thromboembolism: 2 points); CHAD<sub>2</sub>DS<sub>2</sub>-VAS<sub>C</sub> score (congestive heart failure: 1 point; hypertension: 1 point; age ≥ 75 years: 2 points; diabetes mellitus: 1 point; prior stroke or TIA or thromboembolism: 2 points; vascular disease: 1 point; age 65-74 years: 1 point; sex category: 1 point); CRT-D (cardiac resynchronization therapy defibrillator); CRT-P (cardiac resynchronization therapy pacemaker); DOACW Fuse (Direct oral anticoagulants or Warfarin usage); eGFR (estimated glomerular filtration rate); HFmrEF (heart failure with mid-range ejection fraction); HFpEF (heart failure with preserved ejection fraction); HFrEF (heart failure with reduced ejection fraction); ICD (implantable cardioverter defibrillator); NYHA (New York Heart Association); RVSP (Right ventricular systolic pressure)

**Supplementary Table S2. Comparison of Covariate Missing between Death and Survival Patient groups in Development Dataset**

| Covariates                                                           | All-cause mortality<br>(n = 81) | Survive<br>(n = 481) | Abs(difference)<br>(%) |
|----------------------------------------------------------------------|---------------------------------|----------------------|------------------------|
| Age (years)                                                          | 0 (0)                           | 0 (0)                | 0                      |
| Female                                                               | 0 (0)                           | 0 (0)                | 0                      |
| Length of stay (day)                                                 | 0 (0)                           | 0 (0)                | 0                      |
| Weight (kg)                                                          | 1 (1.2)                         | 4 (0.8)              | 0.4                    |
| Hypertension                                                         | 0 (0)                           | 0 (0)                | 0                      |
| Hyperlipemia                                                         | 0 (0)                           | 0 (0)                | 0                      |
| Diabetes mellitus                                                    | 0 (0)                           | 0 (0)                | 0                      |
| Chronotropic incompetence                                            | 0 (0)                           | 0 (0)                | 0                      |
| Ischemic heart disease                                               | 0 (0)                           | 1 (0.2)              | 0.2                    |
| Peripheral arterial disease                                          | 0 (0)                           | 0 (0)                | 0                      |
| Atrial fibrillation                                                  | 0 (0)                           | 0 (0)                | 0                      |
| Vascular disease                                                     | 0 (0)                           | 1 (0.2)              | 0.2                    |
| New York Heart Association (NYHA) at admission                       | 0 (0)                           | 0 (0)                | 0                      |
| NYHA at discharge                                                    | 0 (0)                           | 0 (0)                | 0                      |
| Frail                                                                | 0 (0)                           | 4 (0.8)              | 0.8                    |
| CHADS <sub>2</sub>                                                   | 0 (0)                           | 0 (0)                | 0                      |
| CHA <sub>2</sub> DS <sub>2</sub> -VASc                               | 0 (0)                           | 1 (0.2)              | 0.2                    |
| Independence in daily life for the elderly with cognitive impairment | 3 (3.7)                         | 50 (10.4)            | 6.7                    |
| Low activities of daily life (ADL) at admission                      | 1 (1.2)                         | 3 (0.6)              | 0.6                    |
| Low ADL at discharge                                                 | 6 (7.4)                         | 20 (4.2)             | 3.2                    |
| Left ventricular (LV) ejection fraction (%)                          | 6 (7.4)                         | 35 (7.3)             | 0.1                    |
| LV end-diastolic volume (mL)                                         | 8 (9.9)                         | 45 (9.4)             | 0.5                    |
| LV end-diastolic dimension (mm)                                      | 6 (7.4)                         | 35 (7.3)             | 0.1                    |
| LV end-systolic diameter (mm)                                        | 6 (7.4)                         | 36 (7.5)             | 0.1                    |
| Left atrial diameter (mm)                                            | 7 (8.6)                         | 42 (8.7)             | 0.1                    |
| Mitral regurgitation                                                 | 6 (7.4)                         | 37 (7.7)             | 0.3                    |
| Tricuspid regurgitation                                              | 8 (9.9)                         | 39 (8.1)             | 1.1                    |
| Right ventricular systolic pressure (mmHg)                           | 16 (19.8)                       | 95 (19.8)            | 0                      |
| Atrial septal defect after ablation                                  | 0 (0)                           | 0 (0)                | 0                      |
| Aortic valve replacement                                             | 0 (0)                           | 0 (0)                | 0                      |
| Hemodialysis                                                         | 0 (0)                           | 0 (0)                | 0                      |
| Angiotensin-converting enzyme inhibitor/Angiotensin receptor blocker | 2 (2.5)                         | 3 (0.6)              | 1.9                    |
| Beta blockers                                                        | 2 (2.5)                         | 2 (0.4)              | 2.1                    |
| Diuretic                                                             | 2 (2.5)                         | 3 (0.6)              | 1.9                    |
| Direct oral anticoagulants/Warfarin usage at admission               | 1 (1.2)                         | 2 (0.4)              | 0.8                    |

|                                                                                       |           |          |     |
|---------------------------------------------------------------------------------------|-----------|----------|-----|
| Direct oral anticoagulants/Warfarin usage at discharge                                | 4 (4.9)   | 5 (1.0)  | 3.9 |
| Estimated glomerular filtration rate (eGFR) at admission (mL/min/1.73m <sup>2</sup> ) | 0 (0)     | 3 (0.6)  | 0.6 |
| eGFR at discharge (mL/min/1.73m <sup>2</sup> )                                        | 1 (1.2)   | 31 (6.4) | 5.2 |
| Creatinine clearance rate (CrC) at admission (mL/min)                                 | 2 (2.5)   | 6 (1.2)  | 1.3 |
| CrC at discharge (mL/min)                                                             | 3 (3.7)   | 34 (7.1) | 3.4 |
| Creatinine (Cr) at admission (mg/dL)                                                  | 0 (0)     | 3 (0.6)  | 0.6 |
| Cr at discharge (mg/dL)                                                               | 1 (1.2)   | 31 (6.4) | 5.2 |
| Log(NT-proB-type natriuretic peptide)(pg/mL)                                          | 10 (12.3) | 44 (9.1) | 3.2 |
| Albumin (g/dL)                                                                        | 6 (7.4)   | 39 (8.1) | 0.7 |
| Total protein (g/dL)                                                                  | 7 (8.6)   | 40 (8.3) | 0.3 |
| C-reactive protein (mg/dL)                                                            | 1 (1.2)   | 11 (2.3) | 1.1 |
| Hemoglobin (g/dL)                                                                     | 0 (0)     | 4 (0.8)  | 0.8 |
| Systolic blood pressure (SBP) at admission (mmHg)                                     | 0 (0)     | 0 (0)    | 0   |
| SBP at discharge (mmHg)                                                               | 0 (0)     | 5 (1.0)  | 1   |
| Diastolic blood pressure (DBP) at admission (mmHg)                                    | 0 (0)     | 0 (0)    | 0   |
| DBP at discharge (mmHg)                                                               | 0 (0)     | 5 (1.0)  | 1   |
| Heart rate at admission (bmp)                                                         | 0 (0)     | 1 (0.2)  | 0.2 |
| Heart rate at discharge (bmp)                                                         | 0 (0)     | 5 (1.0)  | 1   |

**Supplementary Table S3. Parameters of RNNSurv**

|                                                                                                                                |                                                                                                                                                      |
|--------------------------------------------------------------------------------------------------------------------------------|------------------------------------------------------------------------------------------------------------------------------------------------------|
| Time-varying predictors<br>(m1-dimension; 2-time steps)                                                                        | Invariant predictors<br>(m2-dimension)                                                                                                               |
| Recurrent neural network (RNN) layer<br>(input_size = m1, hidden_size = m1,<br>num_layers = 1, batch_first = True)             | Fully connected (FC) layer<br>(in_features = m2, out_features = 16)<br>ReLU activation function,<br>BatchNorm1d(num_features = 16)<br>Droup(p = 0.5) |
| FC layer(in_features = m1, out_features = m1)<br>ReLU activation function,<br>BatchNorm1d(num_features = m1)<br>Droup(p = 0.5) |                                                                                                                                                      |
| Concentrate                                                                                                                    |                                                                                                                                                      |
| FC layer(in_features = m1 + 16, out_features = 1)<br>Linear activation function                                                |                                                                                                                                                      |

Due to back elimination, the number of predictors (m1, m2) would change, therefore, the parameter values in RNNSurv would change as well. Then the model would be fixed once back elimination was done. Model was developed by PyTorch 1.5.0 (Curran Associates, Inc.).

**Supplementary Table S4. Comparison Between Patients in Development and Validation Datasets**

| Covariates                                                           | Development<br>(n=562) | Validation<br>(n=168) | P value |
|----------------------------------------------------------------------|------------------------|-----------------------|---------|
| Follow Up (month)                                                    | 30.9±13.7              | 13.6±10.2             | <0.001  |
| All-cause mortality                                                  | 81 (14.4)              | 28 (16.7)             | 0.551   |
| Cardiovascular mortality                                             | 39 (6.9)               | 17 (10.1)             | 0.233   |
| Age (years)                                                          | 77.8±13.3              | 78.0±12.8             | 0.927   |
| Female                                                               | 257 (45.7)             | 74 (44.1)             | 0.767   |
| Length of stay (day)                                                 | 19.3±15.7              | 18.5±13.3             | 0.836   |
| Weight (kg)                                                          | 54.4±14.8              | 52.8±12.0             | 0.142   |
| Body mass index (kg/m <sup>2</sup> )                                 | 21.7±4.4               | 20.8±3.7              | 0.017   |
| Hypertension                                                         | 363 (64.6)             | 107 (63.7)            | 0.903   |
| Hyperlipemia                                                         | 252 (44.8)             | 73 (43.5)             | 0.819   |
| Diabetes mellitus                                                    | 190 (33.8)             | 53 (31.6)             | 0.651   |
| Chronotropic incompetence                                            | 88 (15.7)              | 32 (19.1)             | 0.357   |
| Ischemic heart disease                                               | 179 (31.9)             | 64 (38.1)             | 0.157   |
| Peripheral arterial disease                                          | 50 (8.9)               | 22 (13.1)             | 0.146   |
| Atrial fibrillation                                                  | 303 (53.9)             | 94 (56.0)             | 0.706   |
| Vascular disease                                                     | 194 (34.5)             | 74 (44.1)             | 0.031   |
| New York Heart Association (NYHA) at admission                       |                        |                       | 0.080   |
| 1                                                                    | 24 (4.3)               | 17 (10.1)             |         |
| 2                                                                    | 147 (26.2)             | 42 (25.0)             |         |
| 3                                                                    | 281 (50.0)             | 83 (49.4)             |         |
| 4                                                                    | 110 (19.6)             | 26 (15.5)             |         |
| NYHA at discharge                                                    |                        |                       | 0.005   |
| 1                                                                    | 66 (11.7)              | 38 (22.6)             |         |
| 2                                                                    | 426 (75.8)             | 112 (66.7)            |         |
| 3                                                                    | 54 (9.6)               | 12 (7.1)              |         |
| 4                                                                    | 16 (2.9)               | 6 (3.6)               |         |
| Frail (frailty class≥3)                                              | 525 (93.4)             | 151 (89.9)            | 0.171   |
| CHADS <sub>2</sub>                                                   | 3.0±1.2                | 3.0±1.2               | 0.800   |
| CHA <sub>2</sub> DS <sub>2</sub> -VAsC                               | 5.2±1.8                | 4.7±1.6               | 0.002   |
| Independence in daily life for the elderly with cognitive impairment |                        |                       | 0.627   |
| 0                                                                    | 425 (75.6)             | 134 (79.8)            |         |
| 1                                                                    | 99 (17.6)              | 11 (6.6)              |         |
| 2                                                                    | 31 (5.5)               | 10 (6.0)              |         |
| 3                                                                    | 3 (0.5)                | 7 (4.2)               |         |
| 4                                                                    | 4 (0.7)                | 6 (3.6)               |         |
| Low activities of daily life (ADL) at admission                      | 72 (12.8)              | 18 (10.7)             | 0.554   |
| Low ADL at discharge                                                 | 31 (5.5)               | 8 (4.8)               | 0.853   |
| Left ventricular (LV) ejection fraction (%)                          | 47.2±18.8              | 45.1±18.6             | 0.192   |
| HFrEF                                                                | 197 (35.0)             | 67 (39.9)             |         |
| HFmrEF                                                               | 114 (20.3)             | 30 (17.8)             |         |
| HFpEF                                                                | 251 (44.7)             | 71 (42.3)             |         |

|                                                                                       |            |            |        |
|---------------------------------------------------------------------------------------|------------|------------|--------|
| LV end-diastolic volume (mL)                                                          | 124.8±58.7 | 121.0±50.3 | 0.715  |
| LV end-diastolic dimension (mm)                                                       | 49.7±10.2  | 49.1±9.0   | 0.433  |
| LV end-systolic diameter (mm)                                                         | 38.1±12.3  | 38.1±11.2  | 0.777  |
| Left atrial diameter (mm)                                                             | 45.0±8.4   | 44.3±8.6   | 0.356  |
| Mitral regurgitation                                                                  | 1.5±1.1    | 1.7±1.0    | 0.014  |
| Tricuspid regurgitation                                                               | 1.3±1.1    | 1.3±1.0    | 0.365  |
| Right ventricular systolic pressure (mmHg)                                            | 29.2±10.3  | 27.3±10.2  | 0.034  |
| Atrial septal defect after ablation                                                   | 30 (5.3)   | 13 (7.7)   | 0.331  |
| Aortic valve replacement                                                              | 27 (4.8)   | 10 (6.0)   | 0.693  |
| Hemodialysis                                                                          | 21 (3.7)   | 5 (3.0)    | 0.819  |
| Angiotensin-converting enzyme inhibitor/Angiotensin receptor blocker                  | 268 (47.7) | 64 (38.1)  | 0.036  |
| Beta blockers                                                                         | 286 (50.9) | 85 (50.6)  | 1      |
| Mineralocorticoid receptor antagonist                                                 | 149 (26.5) | 37 (22.0)  | 0.284  |
| Diuretic                                                                              | 302 (53.7) | 73 (43.5)  | 0.024  |
| Direct oral anticoagulants/Warfarin usage at admission                                | 208 (37.0) | 73 (43.5)  | 0.157  |
| Direct oral anticoagulants/Warfarin usage at discharge                                | 272 (48.4) | 90 (53.6)  | 0.276  |
| Estimated glomerular filtration rate (eGFR) at admission (mL/min/1.73m <sup>2</sup> ) | 42.8±21.1  | 44.1±19.6  | 0.458  |
| eGFR at discharge (mL/min/1.73m <sup>2</sup> )                                        | 40.8±21.2  | 47.4±61.3  | 0.197  |
| Creatinine clearance rate (CrC) at admission (mL/min)                                 | 40.3±26.9  | 36.6±20.2  | 0.382  |
| CrC at discharge (mL/min)                                                             | 37.9±24.8  | 38.1±34.8  | 0.669  |
| Creatinine (Cr) at admission (mg/dL)                                                  | 1.5±1.3    | 1.4±1.0    | 0.257  |
| Cr at discharge (mg/dL)                                                               | 1.6±1.5    | 1.5±1.3    | 0.063  |
| Log(NT-proB-type natriuretic peptide)(pg/mL)                                          | 3.6±0.5    | 3.6±0.6    | 0.808  |
| Albumin (g/dL)                                                                        | 3.4±0.5    | 3.4±0.5    | 0.491  |
| Total protein (g/dL)                                                                  | 7.0±0.6    | 6.9±0.7    | 0.094  |
| C-reactive protein (mg/dL)                                                            | 2.3±4.1    | 2.1±4.2    | 0.121  |
| Hemoglobin (g/dL)                                                                     | 11.9±2.4   | 12.1±2.3   | 0.316  |
| Systolic blood pressure (SBP) at admission (mmHg)                                     | 132.1±25.9 | 139.0±32.8 | 0.066  |
| SBP at discharge (mmHg)                                                               | 112.2±18.1 | 119.8±81.0 | 0.422  |
| Diastolic blood pressure (DBP) at admission (mmHg)                                    | 72.8±32.2  | 80.6±24.1  | <0.001 |
| DBP at discharge (mmHg)                                                               | 59.3±10.3  | 61.5±10.4  | 0.017  |
| Heart rate at admission (bmp)                                                         | 85.3±23.1  | 91.7±27.3  | 0.006  |
| Heart rate at discharge (bmp)                                                         | 70.2±13.9  | 70.9±14.6  | 0.592  |



**Supplementary Table S5. Candidate Predictors for All-cause Mortality**

| Univariate CPH analysis                                                         |                                        |         | LASSO analysis                                  | Candidate predictors after multicollinearity checking                                                                                                                                                         |
|---------------------------------------------------------------------------------|----------------------------------------|---------|-------------------------------------------------|---------------------------------------------------------------------------------------------------------------------------------------------------------------------------------------------------------------|
| Selected candidate covariates (P < 0.05)                                        | Hazard ratio (95% confidence interval) | P value | Selected candidate covariates (Coefficient ≠ 0) |                                                                                                                                                                                                               |
| Age                                                                             | 1.04 (1.02-1.06)                       | <0.001  | Age                                             | Age; Length of stay; Prior admission times; IHD; NYHA at discharge; Frailty; CHADS <sub>2</sub> ; LVEF; MR; TR; RVSP; ACEi/ARB; NT-proBNP; HGB; IDL; [eGFR; SBP; DBP; HR; ADL_low] at admission and discharge |
| Prior admission times                                                           | 1.10 (1.02-1.19)                       | 0.016   | Length of stay                                  |                                                                                                                                                                                                               |
| Ischemic heart disease (IHD)                                                    | 1.60 (1.03-2.48)                       | 0.038   | Left ventricular (LV) ejection fraction (LVEF)  |                                                                                                                                                                                                               |
| New York Heart Association (NYHA) at discharge                                  | 3.22 (2.39-4.34)                       | <0.001  | LV end-diastolic volume (LVEDV)                 |                                                                                                                                                                                                               |
| Frailty                                                                         | 1.37 (1.17-1.59)                       | <0.001  | Right ventricular systolic pressure (RVSP)      |                                                                                                                                                                                                               |
| CHADS <sub>2</sub>                                                              | 1.20 (1.003-1.43)                      | 0.046   | eGFR at admission                               |                                                                                                                                                                                                               |
| CHA <sub>2</sub> DS <sub>2</sub> -VASc                                          | 1.15 (1.02-1.30)                       | 0.024   | eGFR at discharge                               |                                                                                                                                                                                                               |
| Mitral regurgitation (MR)                                                       | 1.22 (1.01-1.48)                       | 0.044   | CrC at admission                                |                                                                                                                                                                                                               |
| Tricuspid regurgitation (TR)                                                    | 1.26 (1.05-1.52)                       | 0.015   | CrC at discharge                                |                                                                                                                                                                                                               |
| Angiotensin-converting enzyme inhibitor/Angiotensin receptor blocker (ACEi/ARB) | 1.92 (1.22-3.01)                       | 0.005   | SBP at admission                                |                                                                                                                                                                                                               |
| Estimated glomerular filtration rate (eGFR) at admission                        | 0.98 (0.96-0.99)                       | <0.001  | SBP at discharge                                |                                                                                                                                                                                                               |
| eGFR at discharge                                                               | 0.96 (0.94-0.97)                       | <0.001  | DBP at admission                                |                                                                                                                                                                                                               |
| Creatinine clearance rate (CrC) at admission                                    | 0.97 (0.96-0.98)                       | <0.001  | DBP at discharge                                |                                                                                                                                                                                                               |
| CrC at discharge                                                                | 0.96 (0.94-0.97)                       | <0.001  | HR at admission                                 |                                                                                                                                                                                                               |
| Diastolic blood pressure (DBP) at admission                                     | 1.01 (1.001-1.01)                      | 0.015   | HR at discharge                                 |                                                                                                                                                                                                               |
| Systolic blood pressure (SBP) at discharge                                      | 0.97 (0.95-0.98)                       | <0.001  | Cr at discharge                                 |                                                                                                                                                                                                               |
| DBP at discharge                                                                | 0.96 (0.94-0.98)                       | <0.001  | NT-proBNP                                       |                                                                                                                                                                                                               |
| Heart rate (HR) at discharge                                                    | 1.02 (1.003-1.03)                      | 0.023   |                                                 |                                                                                                                                                                                                               |
| Creatinine (Cr) at admission                                                    | 1.20 (1.08-1.33)                       | <0.001  |                                                 |                                                                                                                                                                                                               |
| Cr at discharge                                                                 | 1.28 (1.19-1.38)                       | <0.001  |                                                 |                                                                                                                                                                                                               |

Supplementary Material

|                                                                            |                   |        |  |  |
|----------------------------------------------------------------------------|-------------------|--------|--|--|
| NT-proB-type natriuretic peptide (NT-proBNP)                               | 1.00 (1.00-1.00)  | 0.003  |  |  |
| Hemoglobin (HGB)                                                           | 0.89 (0.81-0.97)  | 0.008  |  |  |
| Independence in daily life for the elderly with cognitive impairment (IDL) | 1.53 (1.21-1.95)  | <0.001 |  |  |
| Low activities of daily life (ADL) at admission                            | 2.14 (1.25-3.66)  | 0.005  |  |  |
| Low ADL at discharge                                                       | 5.82 (3.25-10.41) | <0.001 |  |  |

**Supplementary Table S6. Comparison Between High- and Low-Risk Patients Stratified by RNNSurv for All-Cause Mortality**

| Covariates                                                           | High risk<br>(n=112) | Low risk<br>(n=450) | P value |
|----------------------------------------------------------------------|----------------------|---------------------|---------|
| Follow Up (month)                                                    | 19.6±15.9            | 33.7±11.6           | <0.001  |
| All-cause mortality                                                  | 58 (51.8)            | 23 (5.1)            | <0.001  |
| Age (years)                                                          | 83.2±9.1             | 76.5±13.8           | <0.001  |
| Female                                                               | 63 (56.3)            | 194 (43.1)          | 0.017   |
| Length of stay (day)                                                 | 20.8±13.2            | 18.9±16.3           | 0.006   |
| Weight (kg)                                                          | 50.3±11.4            | 55.5±15.4           | <0.003  |
| Body mass index (kg/m <sup>2</sup> )                                 | 21.1±3.9             | 21.9±4.5            | 0.167   |
| Hypertension                                                         | 72 (64.3)            | 291 (64.7)          | 1       |
| Hyperlipemia                                                         | 55 (49.1)            | 197 (43.8)          | 0.364   |
| Diabetes mellitus                                                    | 35 (31.3)            | 155 (34.4)          | 0.598   |
| Chronotropic incompetence                                            | 21 (18.8)            | 67 (14.9)           | 0.389   |
| Ischemic heart disease                                               | 51 (45.5)            | 128 (28.4)          | <0.001  |
| Peripheral arterial disease                                          | 15 (13.4)            | 35 (7.8)            | 0.093   |
| Atrial fibrillation                                                  | 63 (56.3)            | 240 (53.3)          | 0.654   |
| Vascular disease                                                     | 53 (47.3)            | 141 (31.3)          | 0.002   |
| New York Heart Association (NYHA) at admission                       |                      |                     | <0.001  |
| 1                                                                    | 3 (2.7)              | 21 (4.7)            |         |
| 2                                                                    | 18 (16.1)            | 129 (28.7)          |         |
| 3                                                                    | 60 (53.6)            | 221 (49.1)          |         |
| 4                                                                    | 31 (27.7)            | 79 (17.6)           |         |
| NYHA at discharge                                                    |                      |                     | <0.001  |
| 1                                                                    | 4 (3.6)              | 62 (13.8)           |         |
| 2                                                                    | 62 (55.4)            | 364 (80.9)          |         |
| 3                                                                    | 33 (29.5)            | 21 (4.7)            |         |
| 4                                                                    | 13 (11.6)            | 3 (0.7)             |         |
| Frail (frailty class≥3)                                              | 111 (99.1)           | 414 (92.0)          | 0.012   |
| CHADS <sub>2</sub>                                                   | 3.2±1.1              | 2.9±1.2             | 0.064   |
| CHA <sub>2</sub> DS <sub>2</sub> -VASC                               | 5.8±1.7              | 5.0±1.8             | <0.001  |
| Independence in daily life for the elderly with cognitive impairment |                      |                     | <0.001  |
| 0                                                                    | 67 (59.8)            | 358 (79.6)          |         |
| 1                                                                    | 28 (25.0)            | 71 (15.8)           |         |
| 2                                                                    | 13 (11.6)            | 18 (4.0)            |         |
| 3                                                                    | 1 (0.9)              | 2 (0.4)             |         |
| 4                                                                    | 3 (2.7)              | 1 (0.2)             |         |
| Low activities of daily life (ADL) at admission                      | 30 (26.8)            | 42 (9.3)            | <0.001  |
| Low ADL at discharge                                                 | 21 (18.8)            | 10 (2.2)            | <0.001  |
| Left ventricular (LV) ejection fraction (%)                          | 47.1±19.0            | 47.3±18.7           | 0.976   |
| LV end-diastolic volume (mL)                                         | 124.4±62.2           | 124.9±57.9          | 0.895   |
| LV end-diastolic dimension (mm)                                      | 49.2±11.1            | 49.8±10.0           | 0.602   |
| LV end-systolic diameter (mm)                                        | 37.8±13.0            | 38.1±12.2           | 0.782   |
| Left atrial diameter (mm)                                            | 46.2±8.7             | 44.7±8.3            | 0.121   |

|                                                                                       |            |            |        |
|---------------------------------------------------------------------------------------|------------|------------|--------|
| Mitral regurgitation                                                                  | 1.9±1.2    | 1.4±1.0    | <0.001 |
| Tricuspid regurgitation                                                               | 1.7±1.3    | 1.2±1.0    | <0.001 |
| Right ventricular systolic pressure (mmHg)                                            | 32.0±11.4  | 28.4±9.9   | 0.002  |
| Atrial septal defect after ablation                                                   | 6 (5.4)    | 24 (5.3)   | 1      |
| Aortic valve replacement                                                              | 4 (3.6)    | 23 (5.1)   | 0.664  |
| Hemodialysis                                                                          | 10 (8.9)   | 11 (2.4)   | 0.003  |
| Angiotensin-converting enzyme inhibitor/Angiotensin receptor blocker                  | 67 (59.8)  | 201 (44.7) | 0.006  |
| Beta blockers                                                                         | 63 (56.3)  | 223 (49.6) | 0.245  |
| Mineralocorticoid receptor antagonist                                                 | 37 (33.0)  | 112 (24.9) | 0.104  |
| Diuretic                                                                              | 65 (58.0)  | 237 (52.7) | 0.361  |
| Direct oral anticoagulants/Warfarin usage at admission                                | 42 (37.5)  | 166 (36.9) | 0.992  |
| Direct oral anticoagulants/Warfarin usage at discharge                                | 43 (38.4)  | 229 (50.9) | 0.024  |
| Estimated glomerular filtration rate (eGFR) at admission (mL/min/1.73m <sup>2</sup> ) | 33.6±23.2  | 45.1±20.0  | <0.001 |
| eGFR at admission > 60 mL/min/1.73m <sup>2</sup>                                      | 12 (10.7)  | 90 (20.0)  |        |
| 30≤eGFR at admission≤60 mL/min/1.73m <sup>2</sup>                                     | 39 (34.8)  | 258 (57.3) |        |
| eGFR at admission < 30 mL/min/1.73m <sup>2</sup>                                      | 61 (54.5)  | 102 (22.7) |        |
| eGFR at discharge (mL/min/1.73m <sup>2</sup> )                                        | 29.1±21.9  | 43.7±20.1  | <0.001 |
| eGFR at discharge > 60 mL/min/1.73m <sup>2</sup>                                      | 7 (6.3)    | 61 (13.6)  |        |
| 30≤eGFR at discharge≤60 mL/min/1.73m <sup>2</sup>                                     | 36 (32.1)  | 284 (63.1) |        |
| eGFR at discharge < 30 mL/min/1.73m <sup>2</sup>                                      | 69 (61.6)  | 105 (23.3) |        |
| Creatinine clearance rate (CrC) at admission (mL/min)                                 | 24.8±15.9  | 44.2±27.7  | <0.001 |
| CrC at discharge (mL/min)                                                             | 22.4±14.9  | 41.7±25.3  | <0.001 |
| Creatinine (Cr) at admission (mg/dL)                                                  | 2.0±1.7    | 1.3±1.1    | <0.001 |
| Cr at discharge (mg/dL)                                                               | 2.5±2.5    | 1.4±1.0    | <0.001 |
| Log(NT-proB-type natriuretic peptide) (pg/mL)                                         | 4.0±0.5    | 3.6±0.5    | <0.001 |
| Albumin (g/dL)                                                                        | 3.2±0.5    | 3.5±0.5    | <0.001 |
| Total protein (g/dL)                                                                  | 7.0±0.7    | 7.0±0.6    | 0.815  |
| C-reactive protein (mg/dL)                                                            | 2.8±4.0    | 2.2±4.1    | 0.005  |
| Hemoglobin (g/dL)                                                                     | 11.2±2.1   | 12.1±2.4   | <0.001 |
| Systolic blood pressure (SBP) at admission (mmHg)                                     | 126.7±32.1 | 133.4±23.9 | 0.041  |
| SBP at discharge (mmHg)                                                               | 105.0±23.7 | 114.0±15.9 | <0.001 |
| Diastolic blood pressure (DBP) at admission (mmHg)                                    | 75.6±63.4  | 72.1±17.4  | 0.088  |
| DBP at discharge (mmHg)                                                               | 56.3±12.2  | 60.1±9.6   | 0.003  |
| Heart rate at admission (bmp)                                                         | 85.0±23.3  | 85.3±23.1  | 0.897  |
| Heart rate at discharge (bmp)                                                         | 73.1±16.9  | 69.5±12.9  | 0.039  |

**Supplementary Table S7. Univariate analysis for High-risk group (All-cause Mortality)**

| Covariate                                              | Hazard ratio      | P value |
|--------------------------------------------------------|-------------------|---------|
| Female                                                 | 0.53 (0.31-0.88)  | 0.015   |
| NYHA at discharge                                      | 1.73 (1.21-2.46)  | 0.002   |
| Low activities of daily life at discharge              | 2.38 (1.29-4.37)  | 0.005   |
| Direct oral anticoagulants/Warfarin usage at discharge | 0.47 (0.27-0.83)  | 0.009   |
| Creatinine at discharge                                | 1.12 (1.03-1.22)  | 0.011   |
| Systolic blood pressure at discharge                   | 0.98 (0.96-0.99)  | <0.001  |
| Diastolic blood pressure at discharge                  | 0.97 (0.95-0.998) | 0.031   |
| Heart rate at discharge                                | 1.02 (1.00-1.03)  | 0.049   |

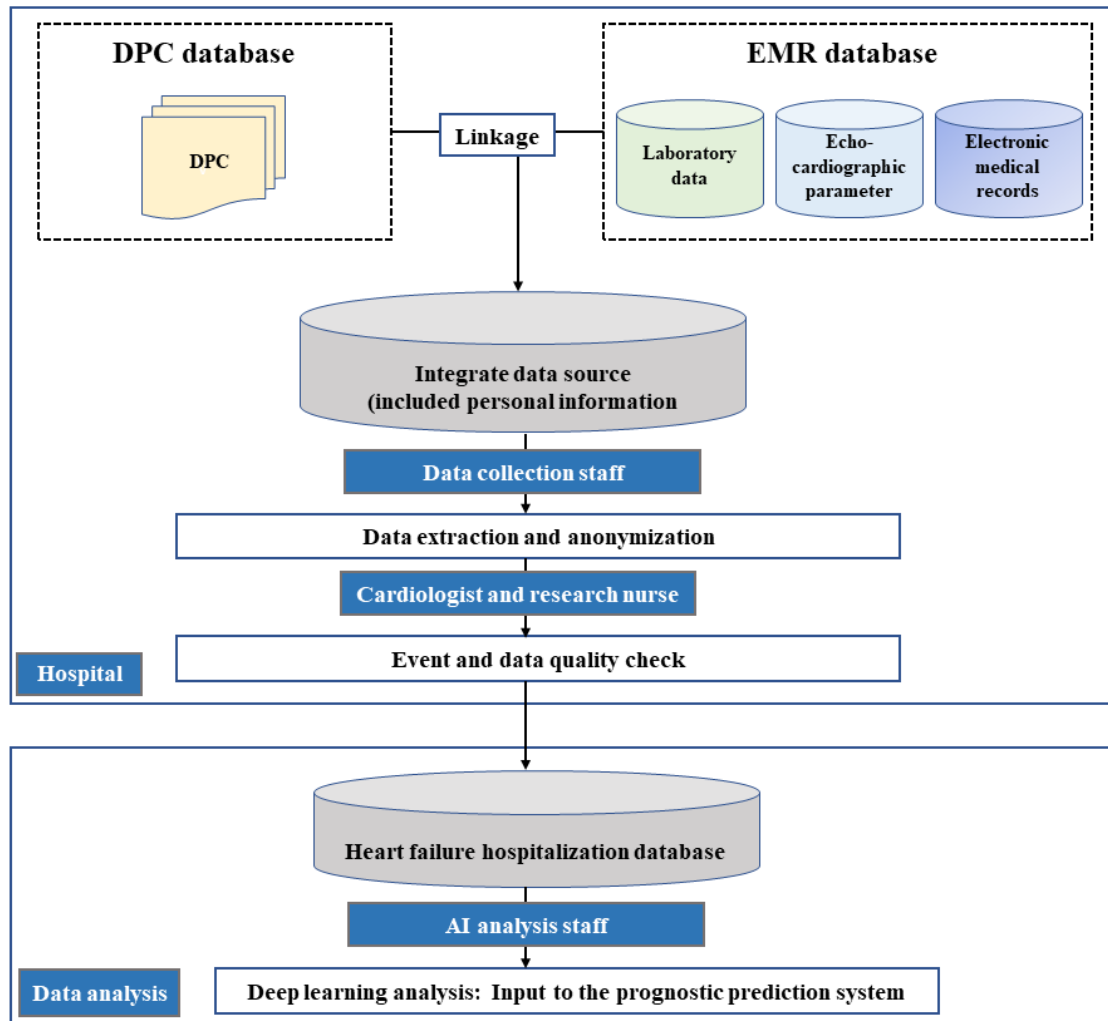

**Supplementary Figure S1. Database construction flowchart.**

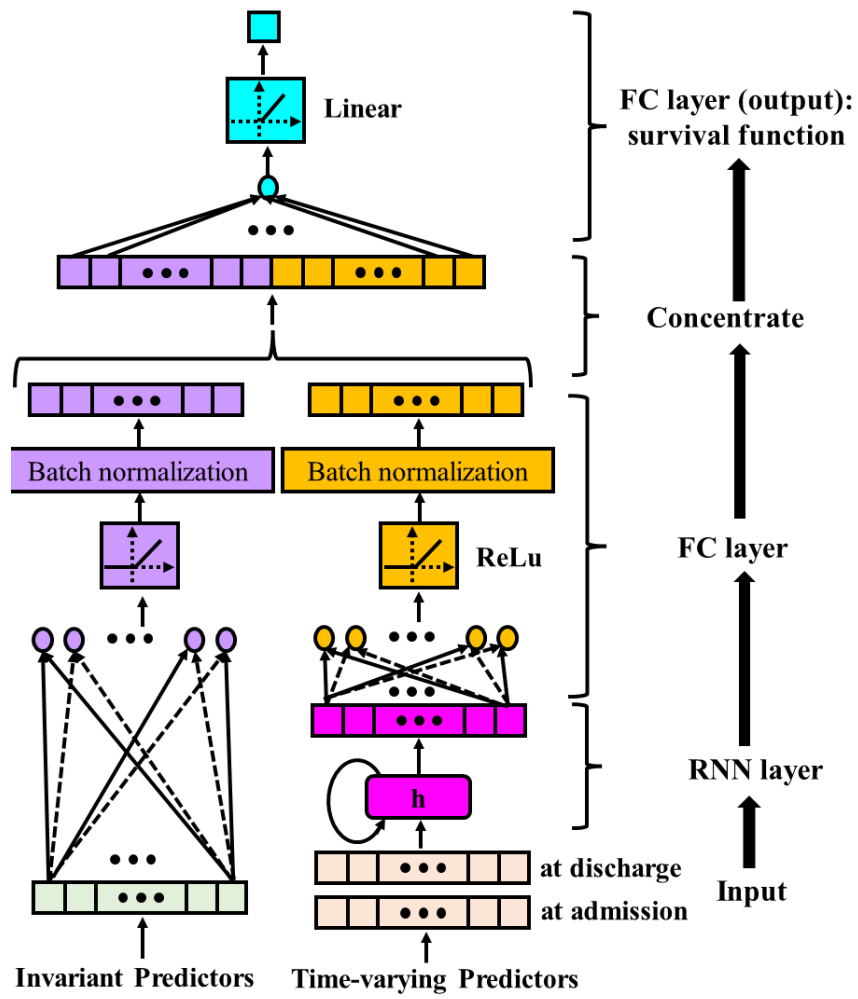

Supplementary Figure S2. Structure of the proposed RNNSurv.

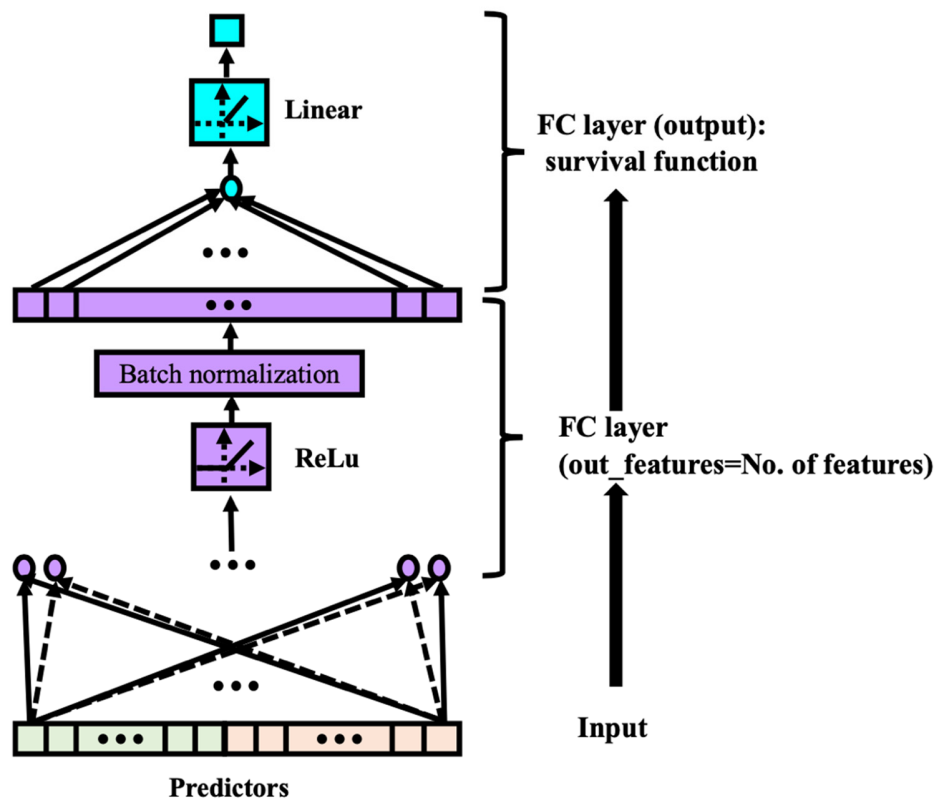

Supplementary Figure S3. Structure of DeepSurv.
